# Supplementary material for: Intermittent and Mild Cold Stimulation Maintains the Immune Function Stability by Increasing the Levels of Intestinal Barrier Genes of Broilers
Source: Preprints.org preprint supplement (doi:10.20944/preprints202306.0632.v1), 2023-06-08
Supplement: Supplementary file 1 [file supplementary]

The original, uncropped, and unedited gel images are as follows:

### **duodenum**

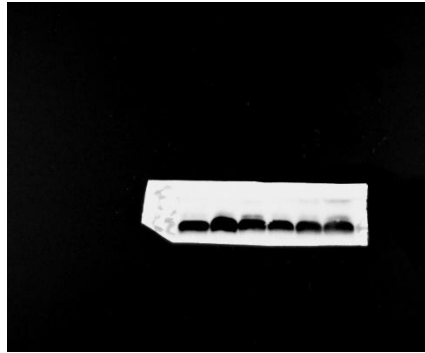

**Figure 1.** Original, uncropped, and unedited  $\beta$ -actin gel image in duodenum. The lanes from left to right represent: 22 d CC, 22d CS3, 22 d CS6, 36 d CC, 36 d CS3, 36 d CS6.

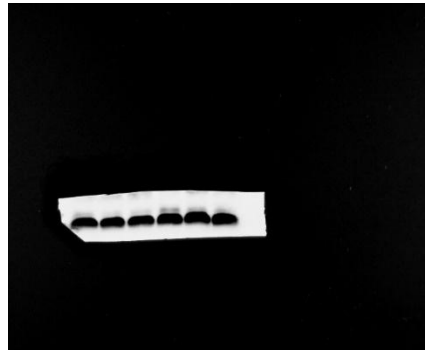

**Figure 2.** Original, uncropped, and unedited  $\beta$ -actin gel image in duodenum. The lanes from left to right represent: 43 d CC, 43 d CS3, 43 d CS6, Y6 CC, Y6 d CS3, Y6 CS6.

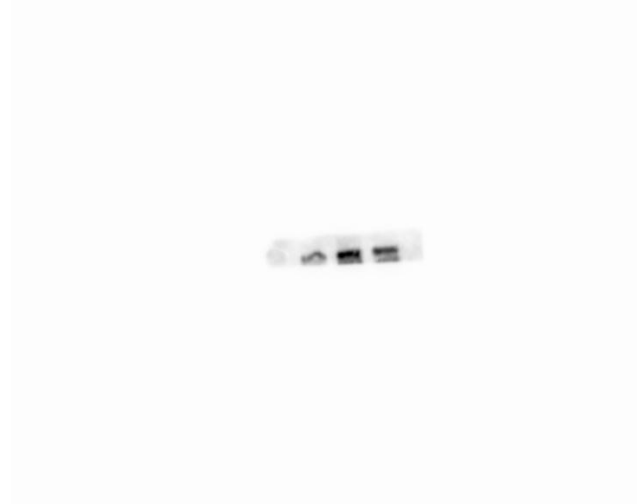

**Figure 3.** Original, uncropped, and unedited Claudin-1 gel image in duodenum. The lanes from left to right represent: 22 d CC, 22d CS3, 22 d CS6.

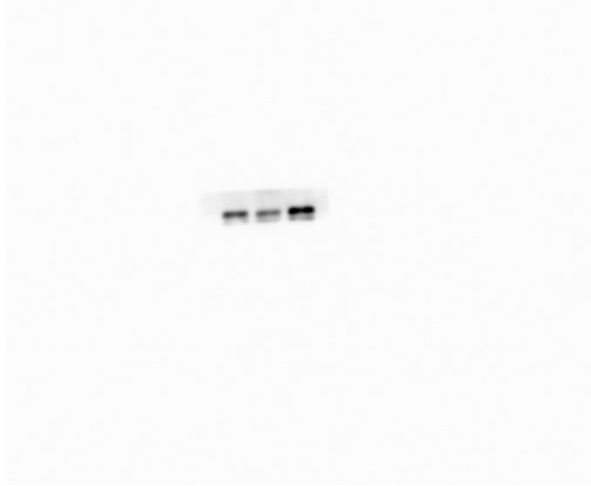

**Figure 4.** Original, uncropped, and unedited Claudin-1 gel image in duodenum. The lanes from left to right represent: 36 d CC, 36 d CS3, 36 d CS6.

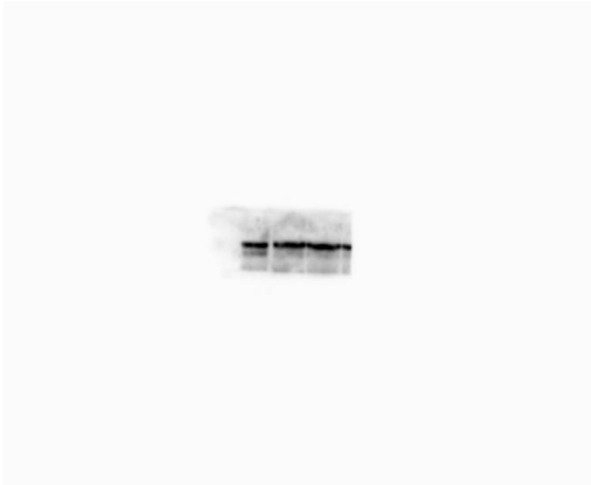

**Figure 5.** Original, uncropped, and unedited Claudin-1 gel image in duodenum. The lanes from left to right represent: 43 d CC, 43 d CS3, 43 d CS6.

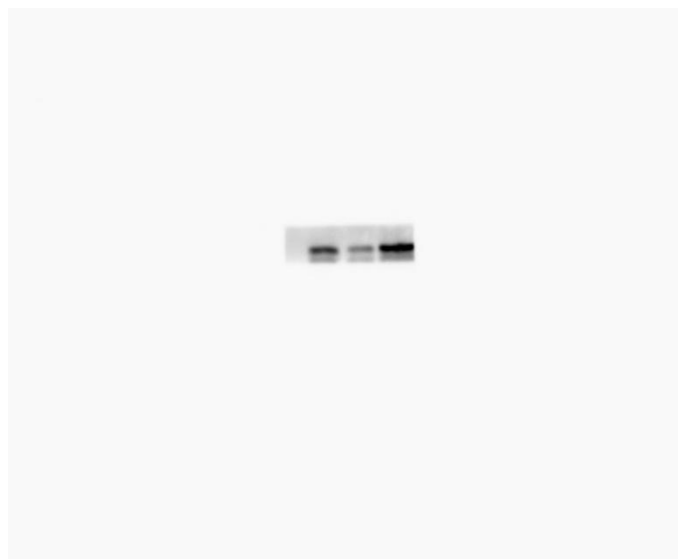

**Figure 6.** Original, uncropped, and unedited Claudin-1 gel image in duodenum. The lanes from left to right represent: Y6 CC, Y6 CS3, Y6 CS6.

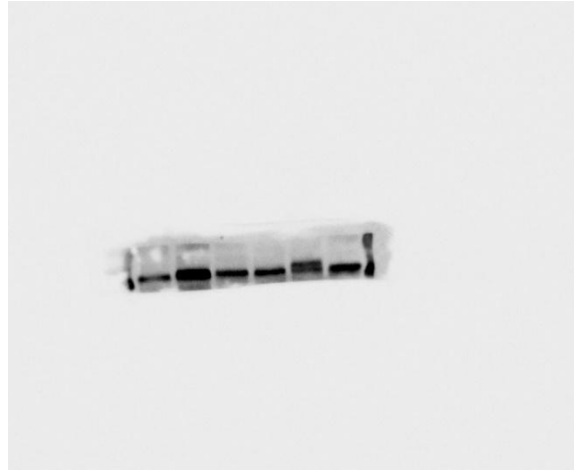

**Figure 7.** Original, uncropped, and unedited E-cadherin gel image in duodenum. The lanes from left to right represent: 22 d CC, 22d CS3, 22 d CS6, 36 d CC, 36 d CS3, 36 d CS6.

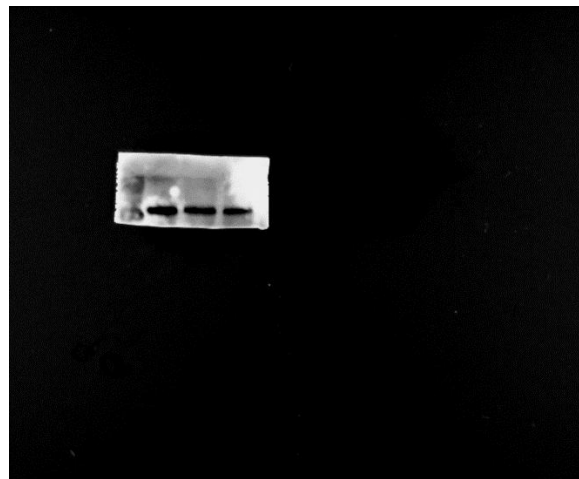

**Figure 8.** Original, uncropped, and unedited E-cadherin gel image in duodenum. The lanes from left to right represent: 43 d CC, 43 d CS3, 43 d CS6.

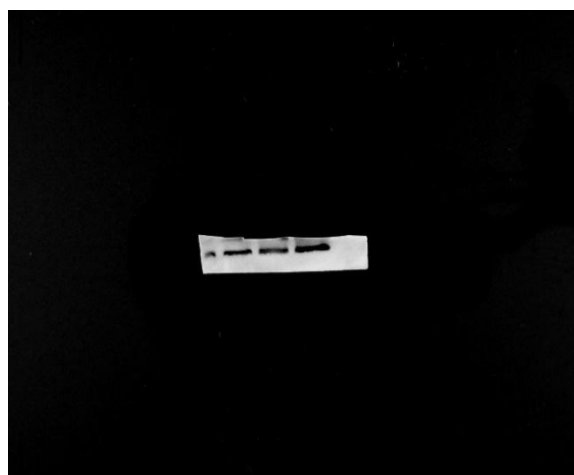

**Figure 9.** Original, uncropped, and unedited E-cadherin gel image in duodenum. The lanes from left to right represent: Y6 CC, Y6 CS3, Y6 CS6.

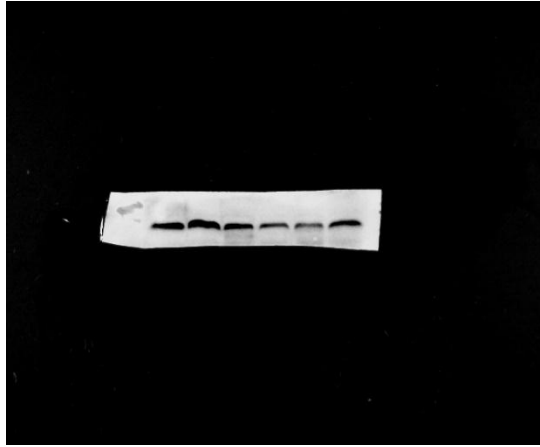

**Figure 10.** Original, uncropped, and unedited Occludin gel image in duodenum. The lanes from left to right represent: 22 d CC, 22d CS3, 22 d CS6, 36 d CC, 36 d CS3, 36 d CS6.

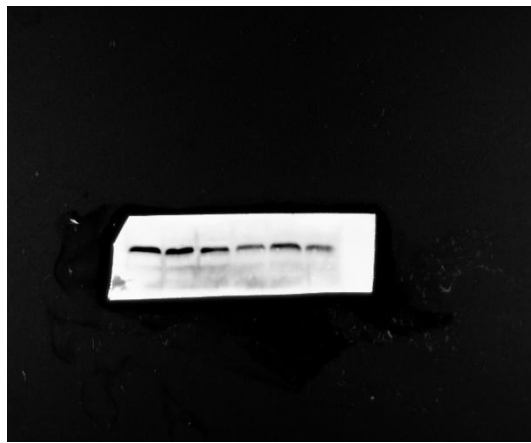

**Figure 11.** Original, uncropped, and unedited Occludin gel image in duodenum. The lanes from left to right represent: 43 d CC, 43 d CS3, 43 d CS6, Y6 CC, Y6 d CS3, Y6 CS6.

## jejunum

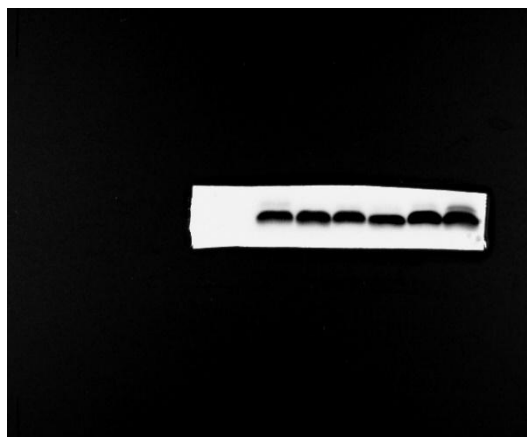

**Figure 12.** Original, uncropped, and unedited  $\beta$ -actin gel image in jejunum. The lanes from left to right represent: 22 d CC, 22d CS3, 22 d CS6, 36 d CC, 36 d CS3, 36 d CS6.

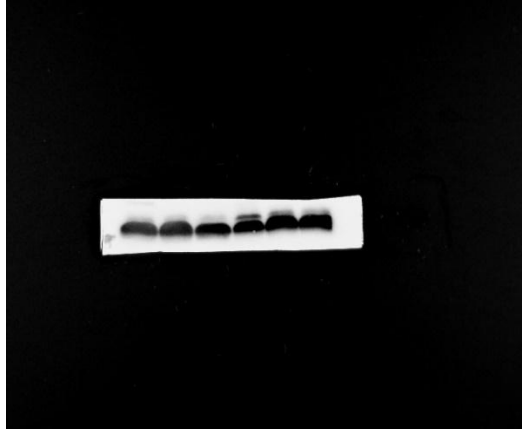

**Figure 13.** Original, uncropped, and unedited  $\beta$ -actin gel image in jejunum. The lanes from left to right represent: 43 d CC, 43 d CS3, 43 d CS6, Y6 CC, Y6 d CS3, Y6 CS6.

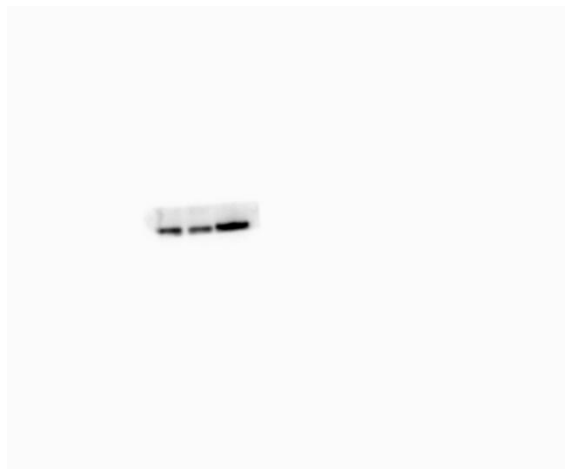

**Figure 14.** Original, uncropped, and unedited Claudin-1 gel image in jejunum. The lanes from left to right represent: 22 d CC, 22d CS3, 22 d CS6.

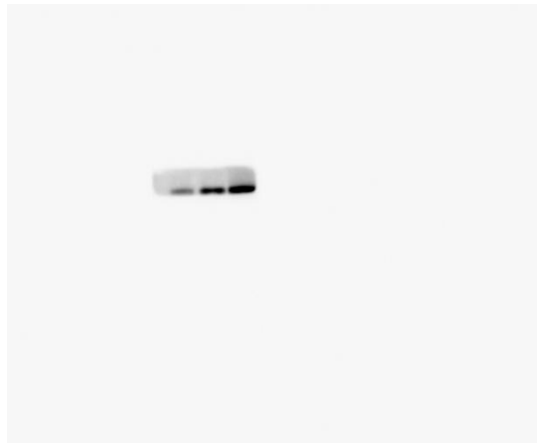

**Figure 15.** Original, uncropped, and unedited Claudin-1 gel image in jejunum. The lanes from left to right represent: 36 d CC, 36 d CS3, 36 d CS6.

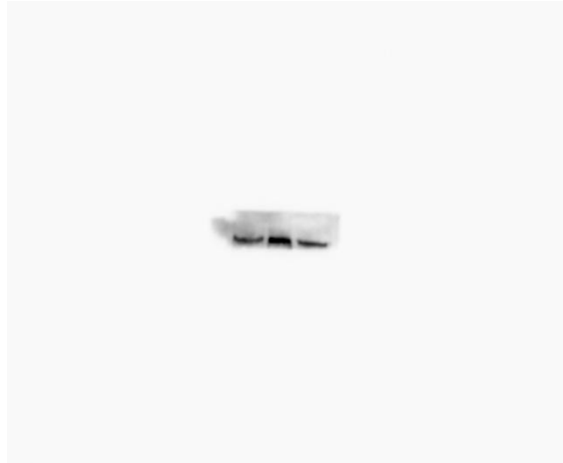

**Figure 16.** Original, uncropped, and unedited Claudin-1 gel image in jejunum. The lanes from left to right represent: 43 d CC, 43 d CS3, 43 d CS6.

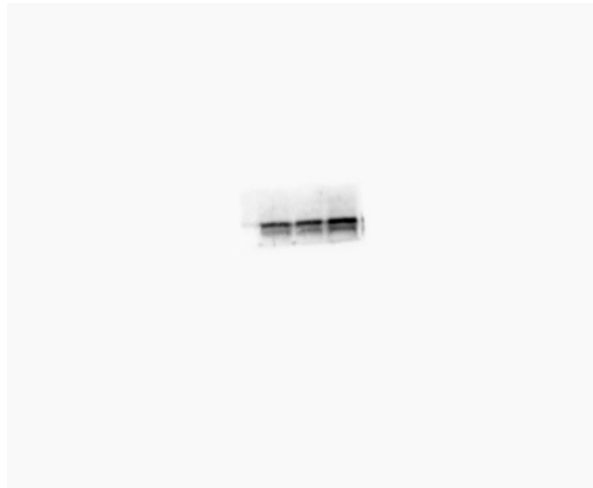

**Figure 17.** Original, uncropped, and unedited Claudin-1 gel image in jejunum. The lanes from left to right represent: Y6 CC, Y6 CS3, Y6 CS6.

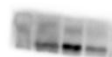

**Figure 18.** Original, uncropped, and unedited E-cadherin gel image in jejunum. The lanes from left to right represent: 22 d CC, 22d CS3, 22 d CS6.

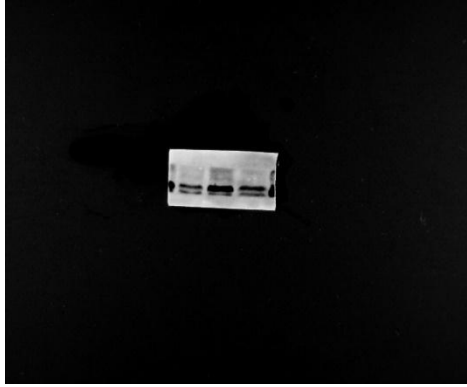

**Figure 19.** Original, uncropped, and unedited E-cadherin gel image in jejunum. The lanes from left to right represent: 36 d CC, 36 d CS3, 36 d CS6.

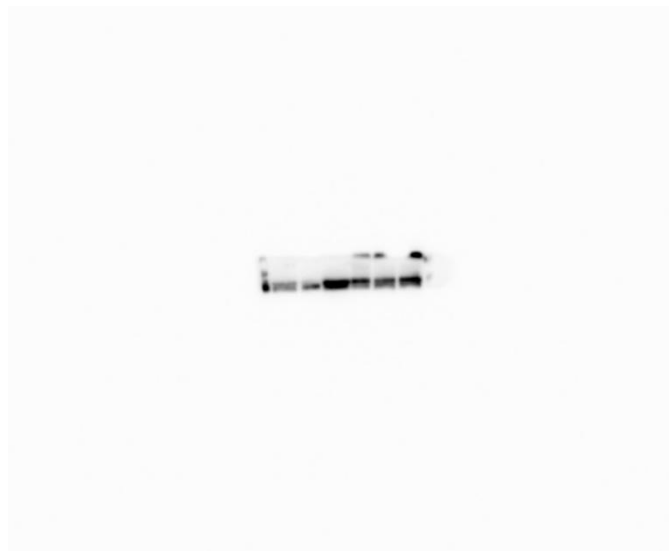

**Figure 20.** Original, uncropped, and unedited E-cadherin gel image in jejunum. The lanes from left to right represent: 43 d CC, 43 d CS3, 43 d CS6, Y6 CC, Y6 d CS3, Y6 CS6.

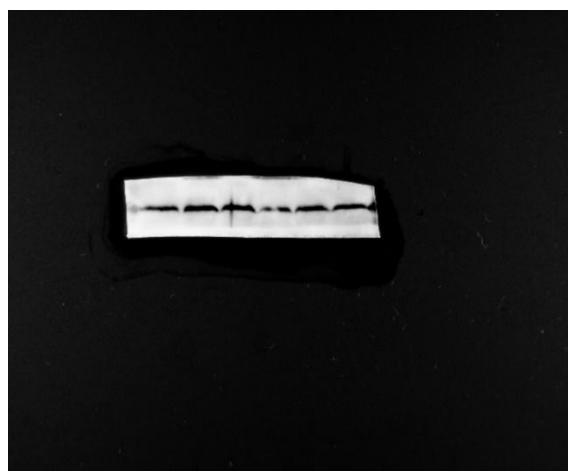

**Figure 21.** Original, uncropped, and unedited Occludin gel image in jejunum. The lanes from left to right represent: 22 d CC, 22d CS3, 22 d CS6, 36 d CC, 36 d CS3, 36 d CS6.

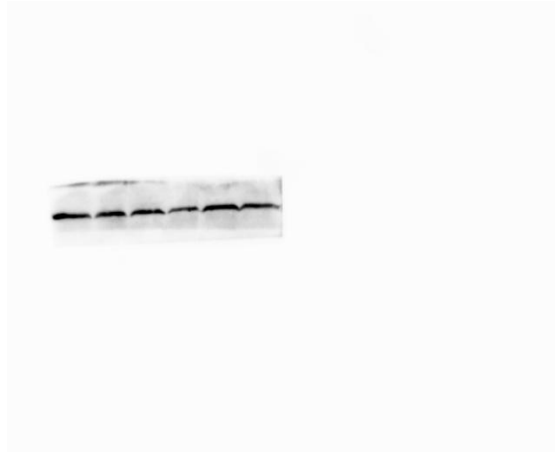

**Figure 22.** Original, uncropped, and unedited Occludin gel image in jejunum. The lanes from left to right represent: 43 d CC, 43 d CS3, 43 d CS6, Y6 CC, Y6 d CS3, Y6 CS6.
